# Supplementary material for: Analysis of high gas concentration and flux measurements at Swiss Beromünster tall tower
Source: Copernicus journal article supplement (doi:10.5194/egusphere-2022-1019), 2022-12-22
Supplement: Supplementary file 1 [file egusphere-2022-1019-supplement.pdf]

Analysis of high gas concentration and flux  
measurements at Swiss Beromünster tall tower  
(Supplementary material)

Plach et al., 2022

# 1 Data availability

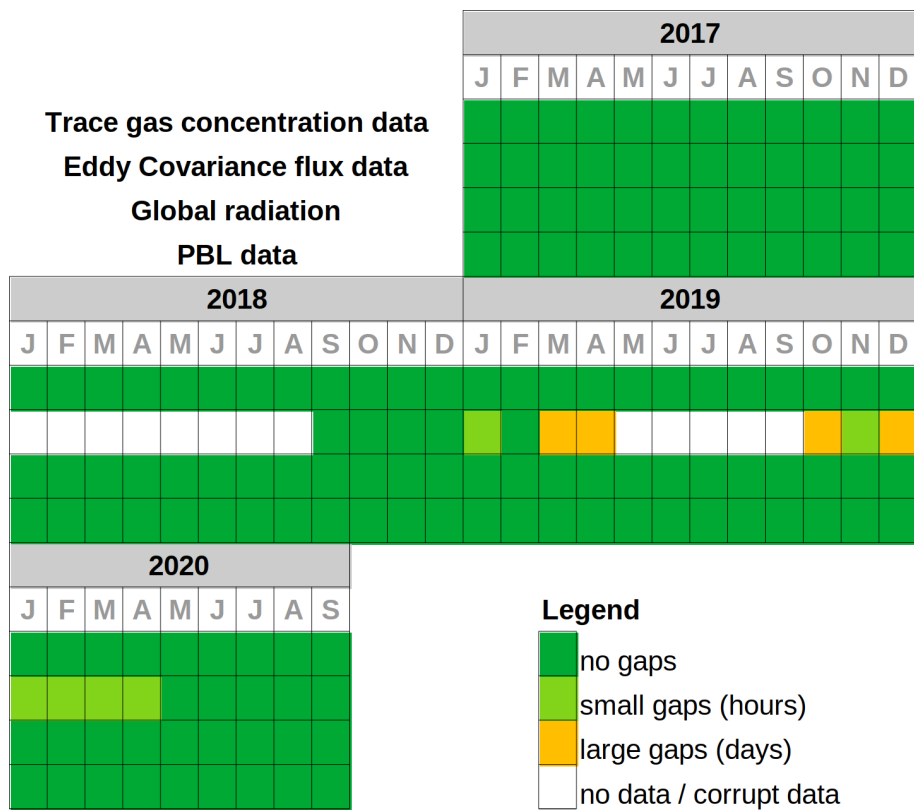

Figure S1: **Overview of data availability of key variables** used in the corresponding paper in the period of interest 2017 to 2020. For further details on the data used, see the method section of the corresponding paper.

## 2 Global radiation data

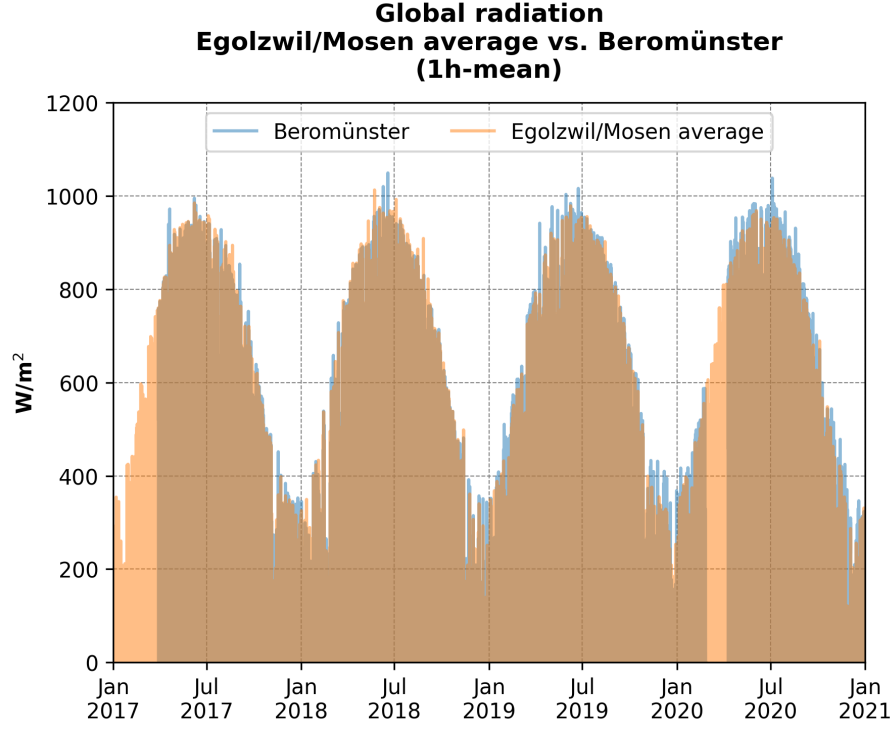

Figure S2: **Comparison of the used global radiation (average of two MeteoSwiss stations — Egolzwil and Mosen) and measurements directly at Beromünster.** Egolzwil/Mosen and Beromünster data is available at a 10-min and 1-hourly resolution, respectively. For the comparison both data sets are averaged to 1-hourly means. The global radiation data is used for the flux gap-filling procedure (see method section of the corresponding paper).

### 3 Overview plots - Wind roses

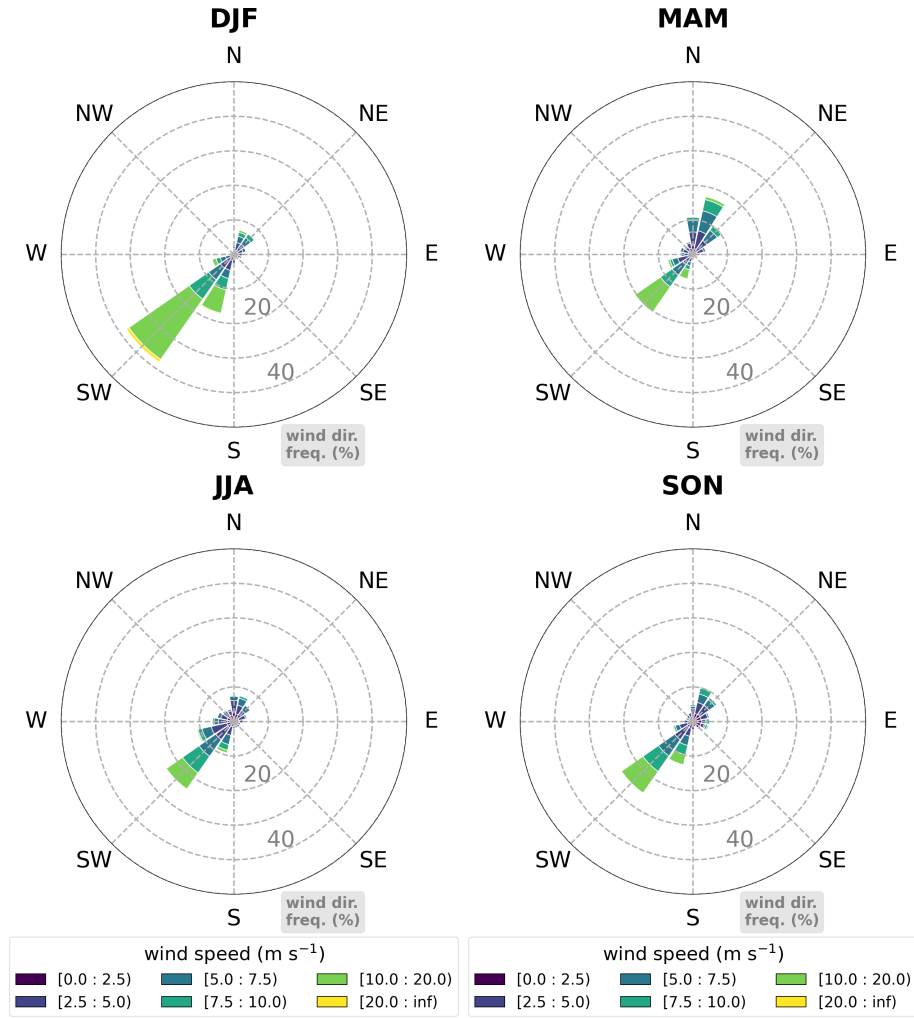

Figure S3: **Wind roses for the Beromünster site** (entire data set) **divided by season:** winter (DJF), spring (MAM), summer (JJA), fall (SON).

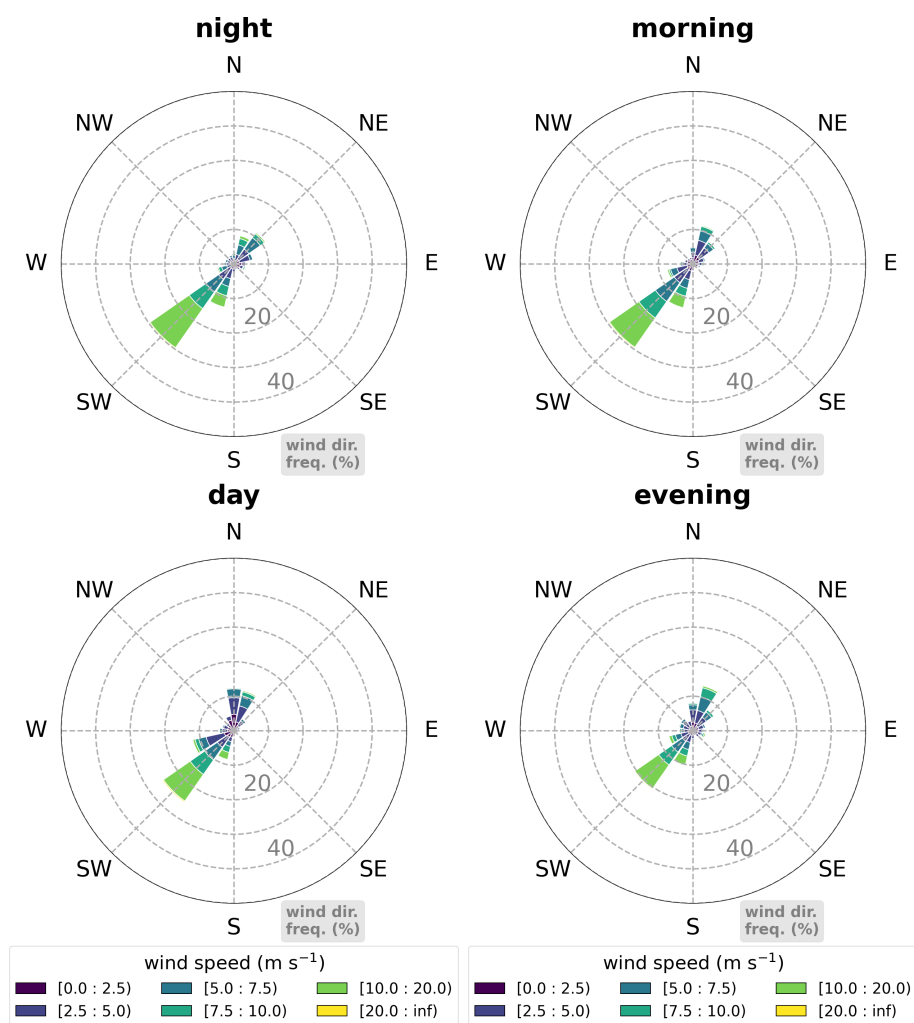

Figure S4: **Wind roses for the Beromünster site** (entire data set) **divided by time of day**: night, morning, day, evening. For details on the hours included in the respective periods see the method section of the corresponding paper.

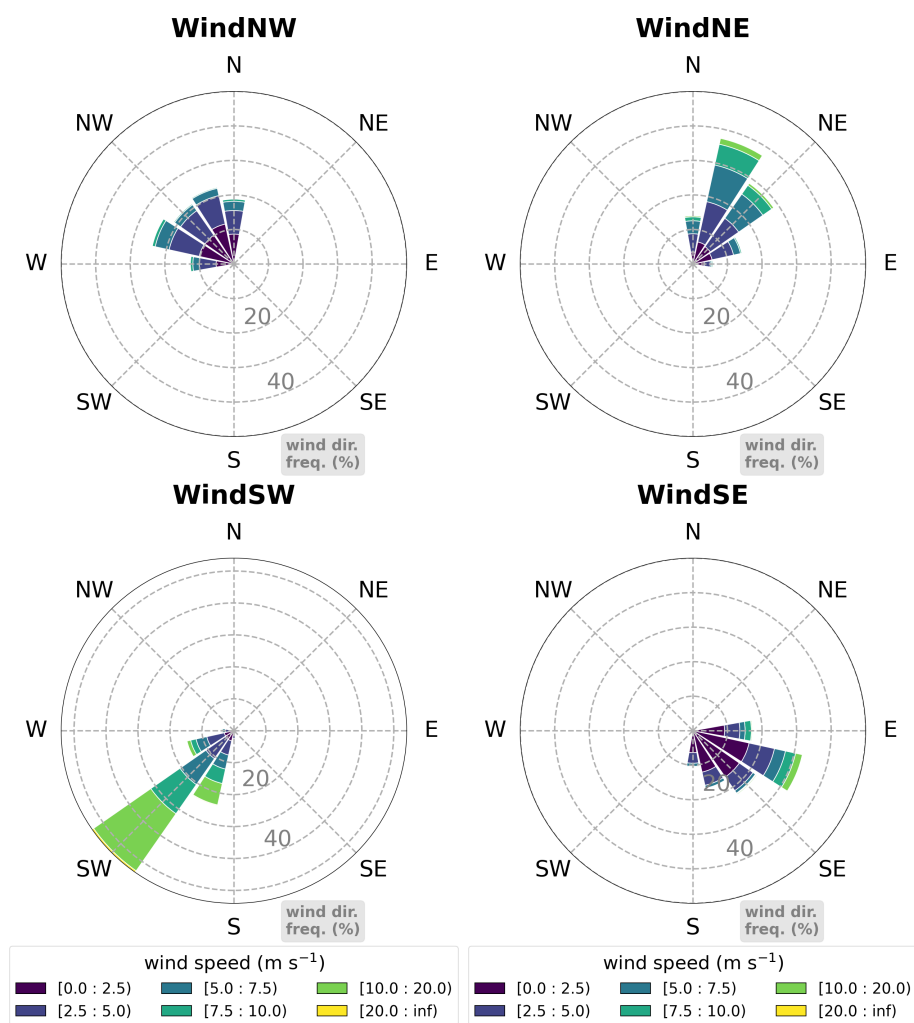

Figure S5: **Wind roses for the Beromünster site** (entire data set) **divided by wind direction:** WindNW, WindNE, WindSW, WindSE. For details on data separation see the method section of the corresponding paper.

## 4 Overview plots - Other meteorological data

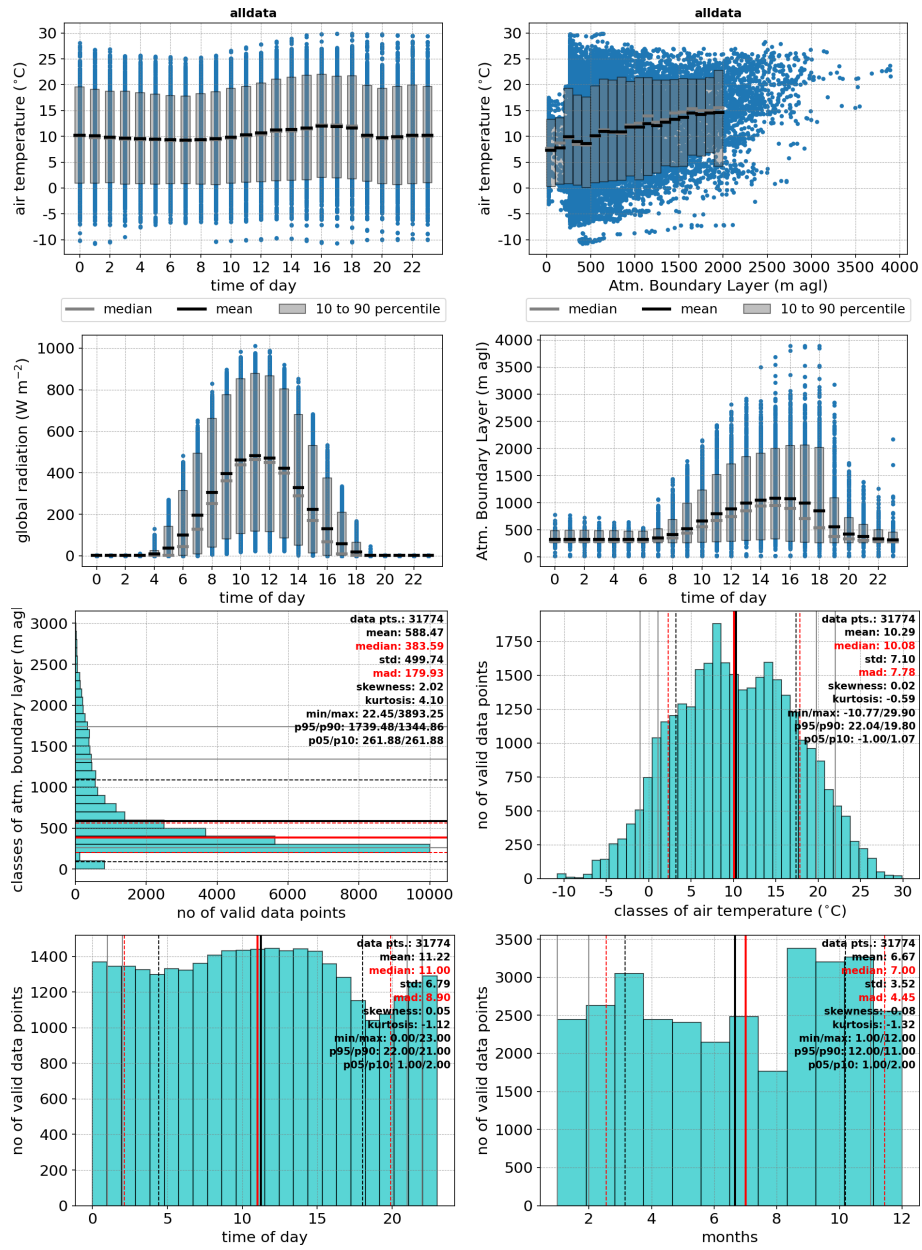

Figure S6: Overview plots for **additional meteorological variables** (entire data set): **alldata**

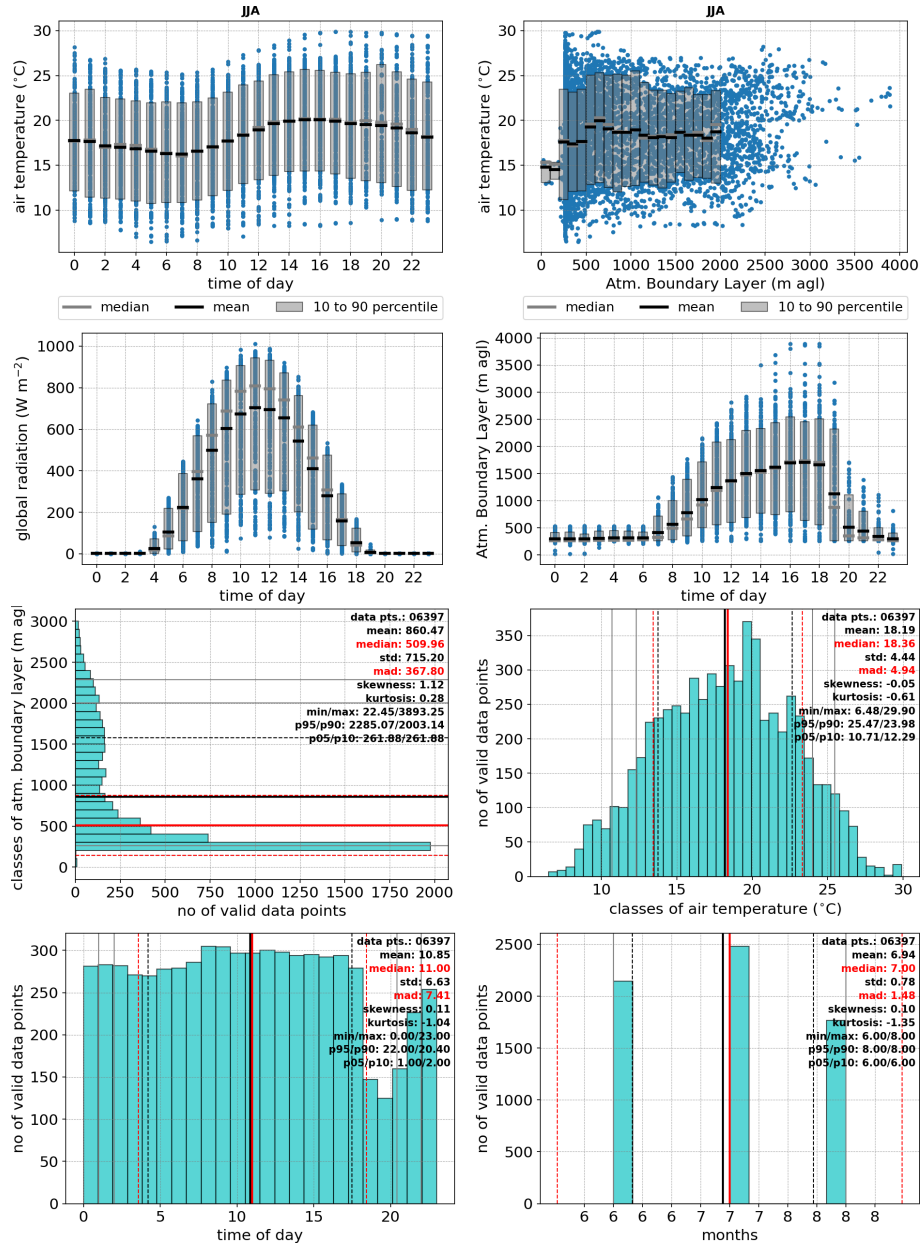

Figure S7: Overview plots for **additional meteorological variables** (entire data set): **summer (JJA)**



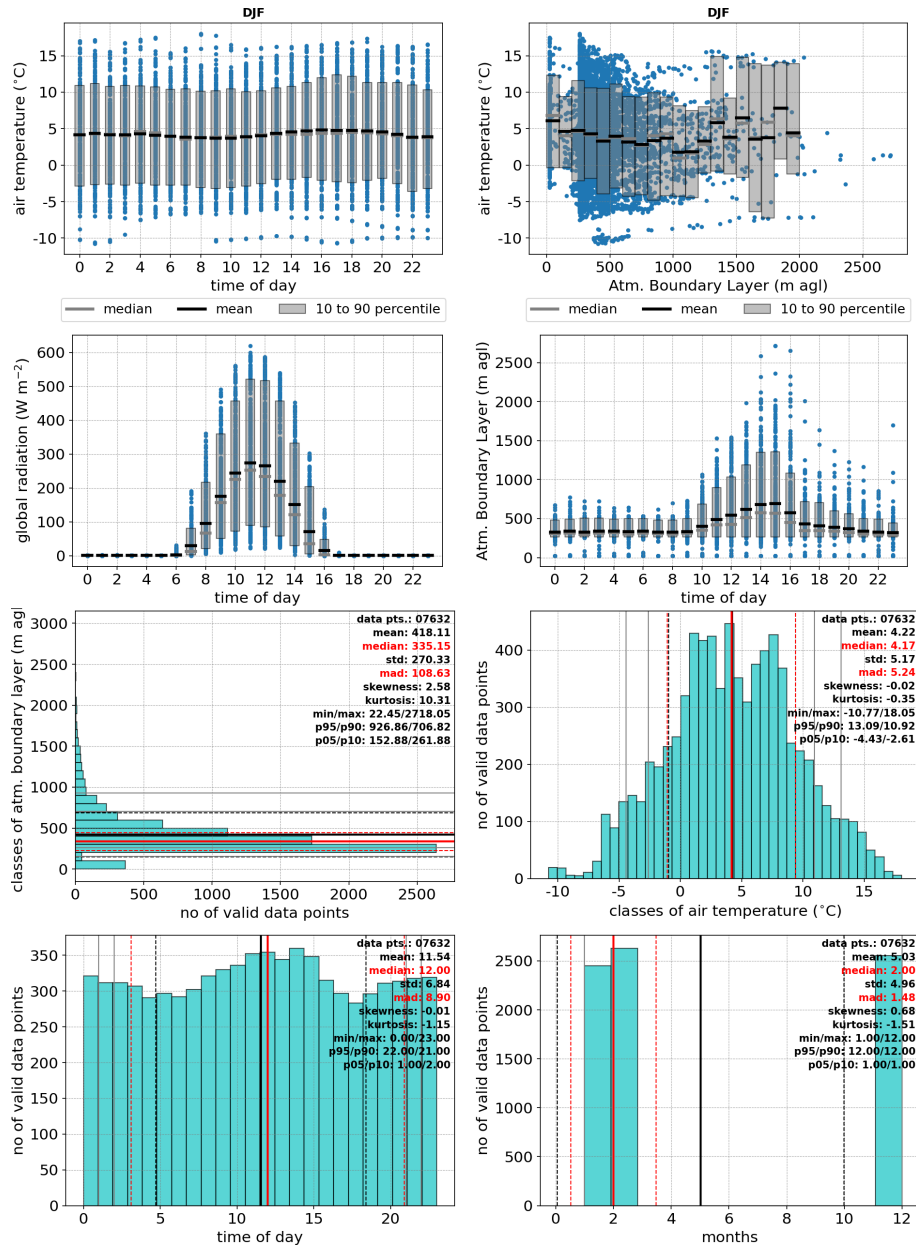

Figure S8: Overview plots for **additional meteorological variables** (entire data set): **winter (DJF)**

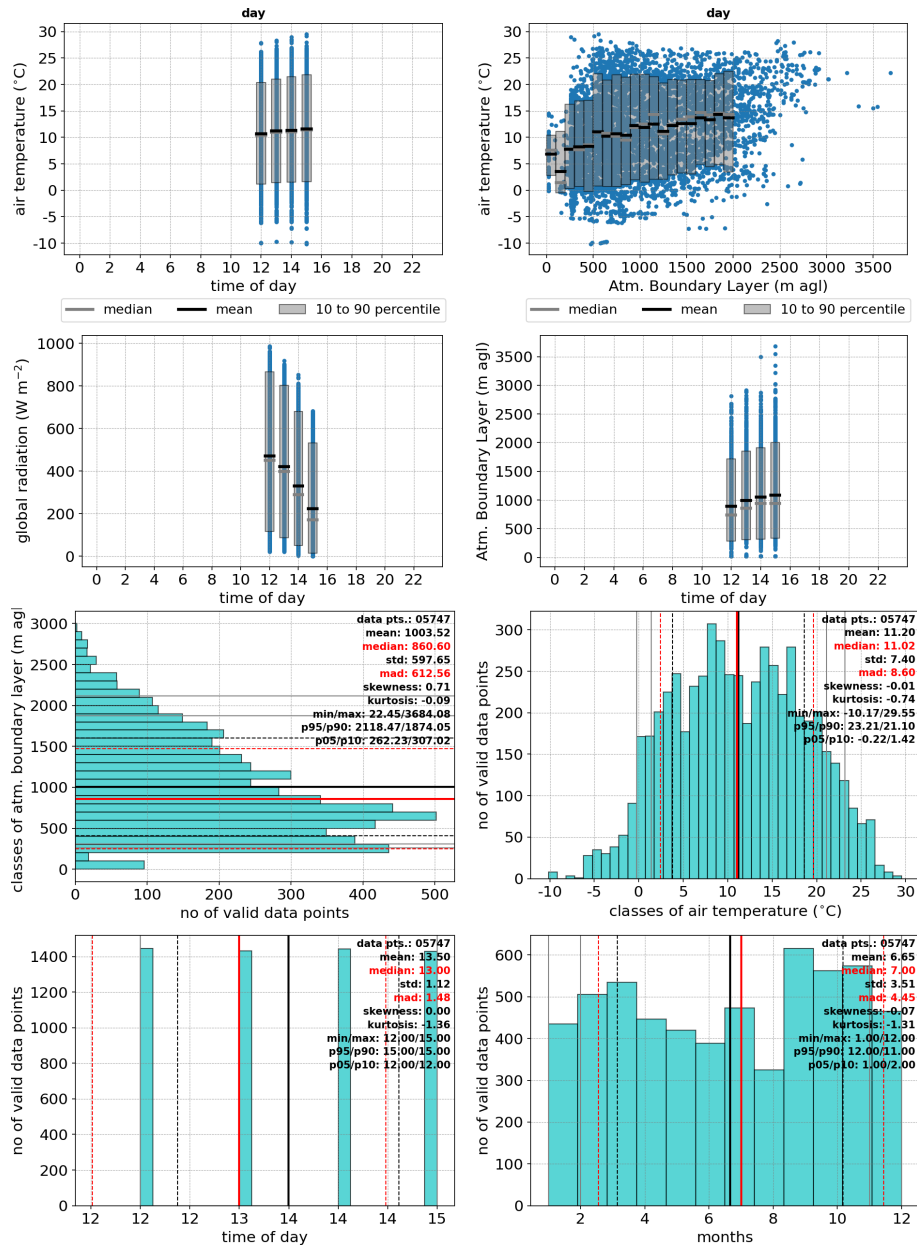

Figure S9: Overview plots for **additional meteorological variables** (entire data set): **day**

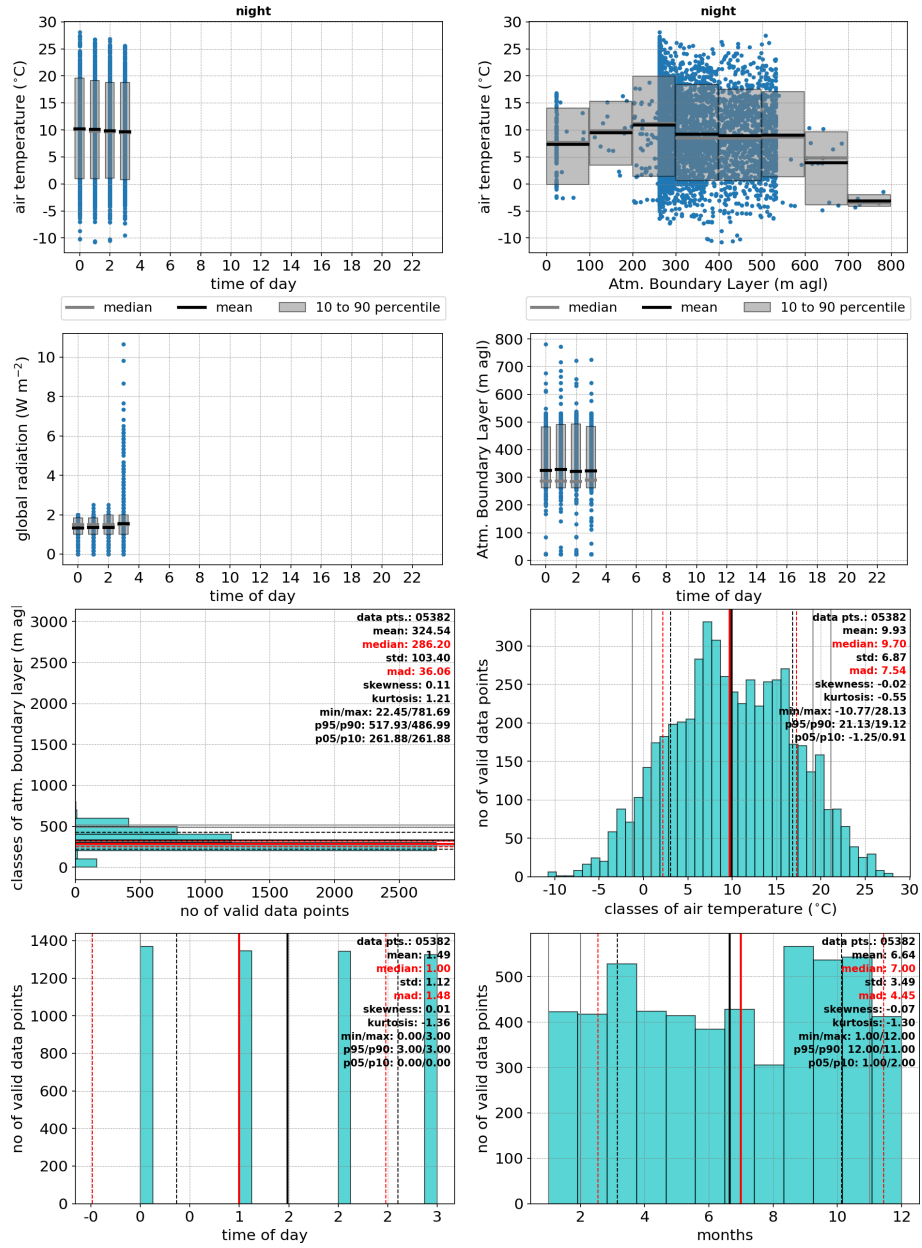

Figure S10: Overview plots for **additional meteorological variables** (entire data set): **night**

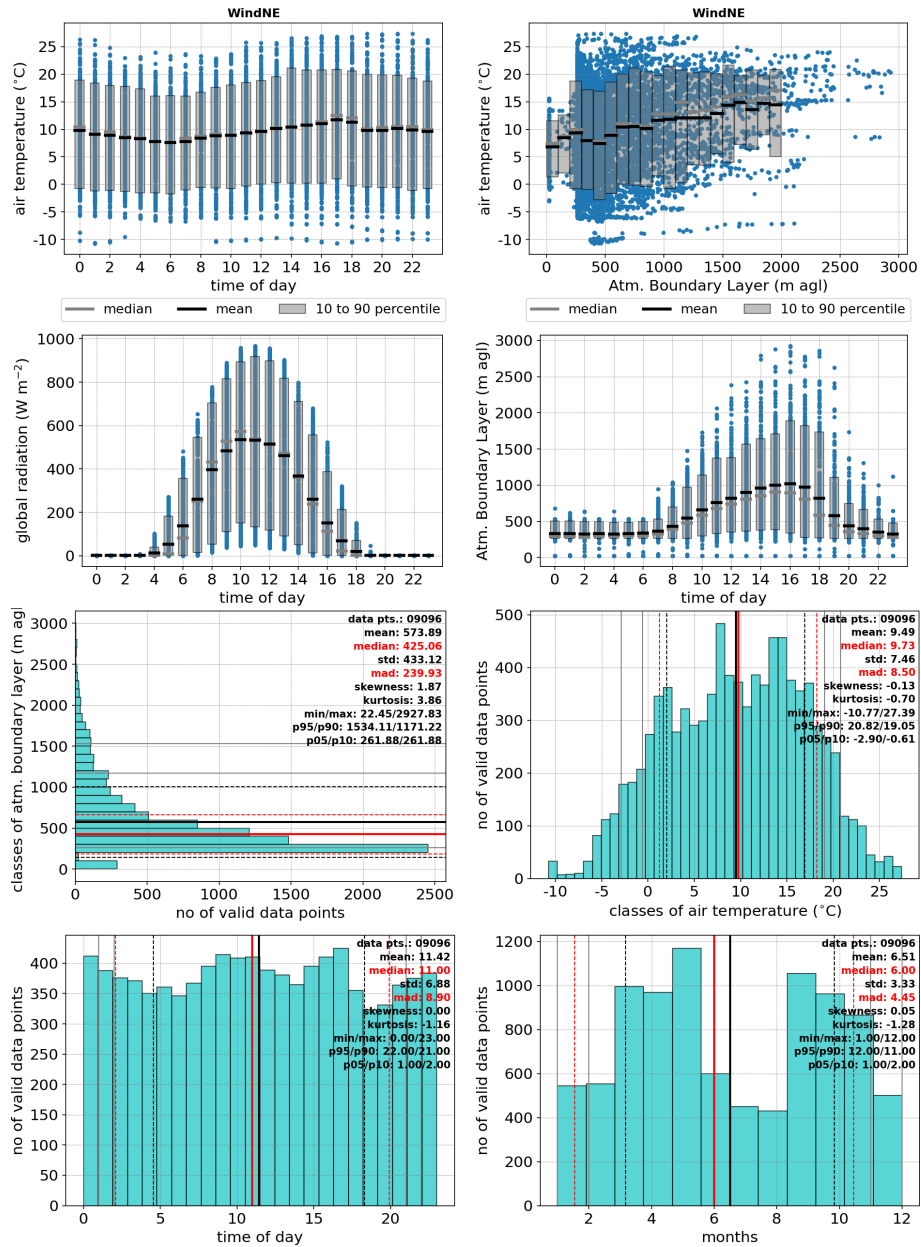

Figure S11: Overview plots for **additional meteorological variables** (entire data set): **wind from the Northeast (WindNE)**
